# Supplementary material
Source: Springer Nature journal article supplement (https://www.springermedizin.de/resource/supplementary/12913_2014_3466_MOESM1_ESM.pdf/9532916)
Supplement: MOESM1 [file 9532916]

**Additional file 1: Criteria used for assessment of validity of included studies**

| <b>SECTION</b>             | <b>CRITERIA</b>                                                                     | <b>JUSTIFICATION</b>                                                                                                                                                                                                                     |
|----------------------------|-------------------------------------------------------------------------------------|------------------------------------------------------------------------------------------------------------------------------------------------------------------------------------------------------------------------------------------|
| <b>CHOICE TASK DESIGN</b>  | Choice of attributes and levels grounded in qualitative work with target population | Attributes and levels should be salient to the target population to ensure comprehension and engagement with the choice task                                                                                                             |
|                            | No conceptual overlap between attributes                                            | Attributes should be conceptually distinct and vary independently of each other, otherwise effects will not be independent                                                                                                               |
|                            | Uni-dimensional attributes                                                          | Attributes that encompass several aspects of an attribute introduce variability into the choice process as participants may focus on different aspects and the resulting preferences can only be interpreted as being for all dimensions |
|                            | Inclusion of an opt-out or status quo option or justification of forced choice      | Choices that force participants to accept an unappealing job are likely to lead to overestimation of preferences                                                                                                                         |
| <b>EXPERIMENTAL DESIGN</b> | Experimental design optimal or statistically efficient                              | Designs that are non-optimal or inefficient will lead to less accurate preferences                                                                                                                                                       |
| <b>CONDUCT</b>             | Piloting conducted amongst target population                                        | Validity of choice task design and questionnaire features should be tested with participants from target population and subgroups                                                                                                        |
|                            | Target population(s) appropriate for research objective                             | Preferences of target population should be sufficient to answer research objective                                                                                                                                                       |
|                            | Sampling frame representative of target population                                  | Sampling frames that exclude part of the target population may lead to bias in preferences                                                                                                                                               |
|                            | Response rate sufficient to minimise response bias                                  | A low response rate may indicate selection bias amongst participants, whose preferences may not be representative of the target population                                                                                               |
| <b>ANALYSIS</b>            | Any pooled analysis from different subgroups appropriate                            | Pooled analyses from very heterogeneous subgroups may mask marked differences in preferences                                                                                                                                             |
|                            | Econometric model appropriate for choice task design                                | Model should be appropriate for the choice task and number of alternatives presented to participants                                                                                                                                     |
|                            | Econometric model accounts for serial correlation of choices                        | As multiple observations are obtained from each participant, the econometric model should take account of panel nature of data to avoid overestimation of the differences between preferences                                            |
|                            | Relative attribute effects compared using a common metric                           | Preferences for different attributes cannot be compared directly using parameter estimates due to confounding with the underlying utility scales                                                                                         |
